# Supplementary material
Source: PubMed Central journal article supplement (PMC7552916)
Supplement: NIHMS1633595-supplement-Figures_S1-S3_and_Table_S1.pdf [file NIHMS1633595-supplement-Figures_S1-S3_and_Table_S1.pdf]

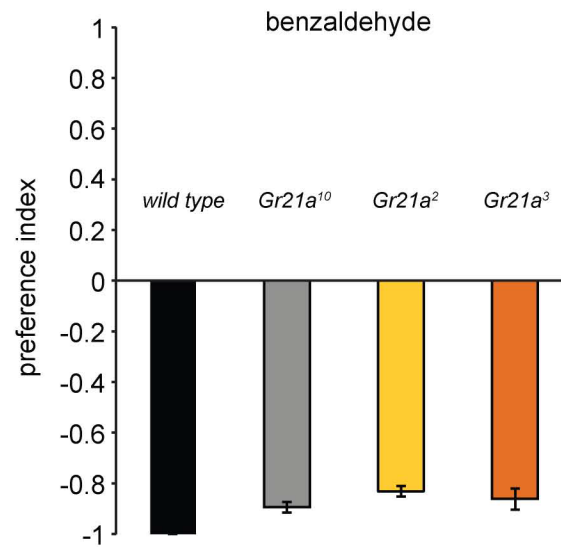

**Figure S1. Related to Figure 1.**

Behavioral responses to benzaldehyde in Gr21a mutants (n = 10). Error bars are s.e.m.

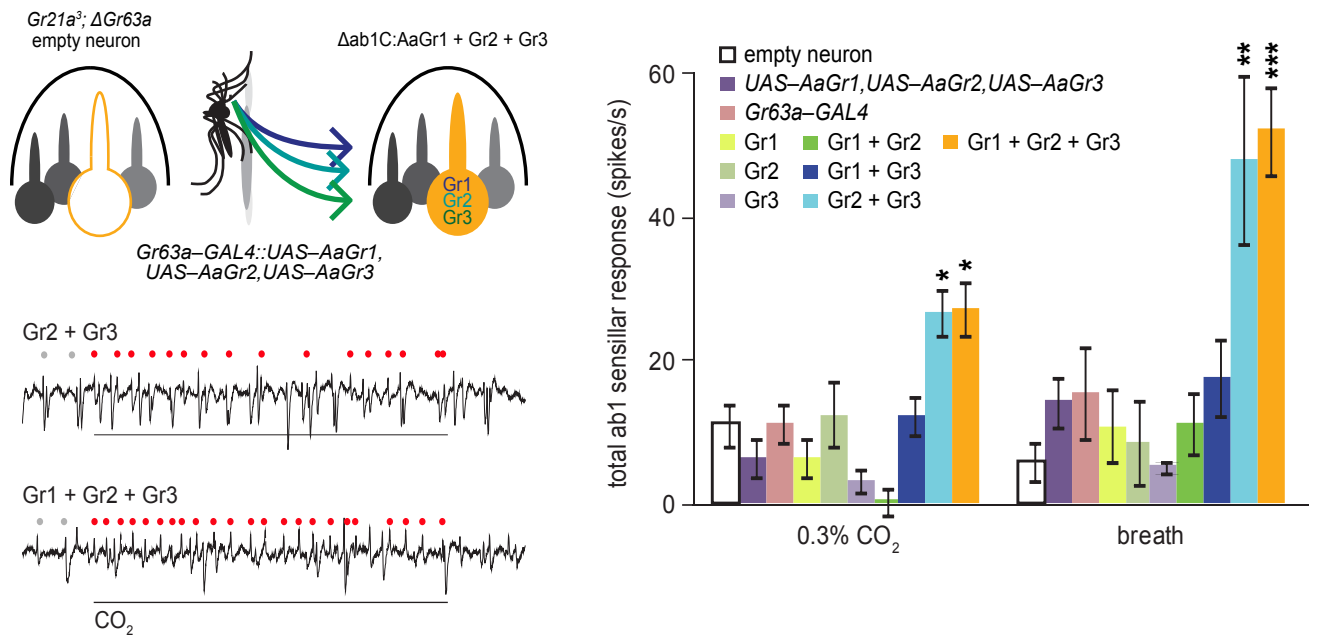

### Figure S2. Related to Figure 3.

Schematic, representative traces, and mean responses of ab1 sensilla expressing mosquito receptors in the  $CO_2$  empty neuron to 0.5 s stimuli of  $CO_2$  or puffs of exhaled breath. One copy of each indicated transgene was present. Dots mark action potentials attributed to the ab1C neuron. (n = 6–28; ANOVA followed by Dunnett's test comparing results to empty neuron control, \*p < 0.05, \*\*p < 0.01, \*\*\*p < 0.001). Error bars are s.e.m.

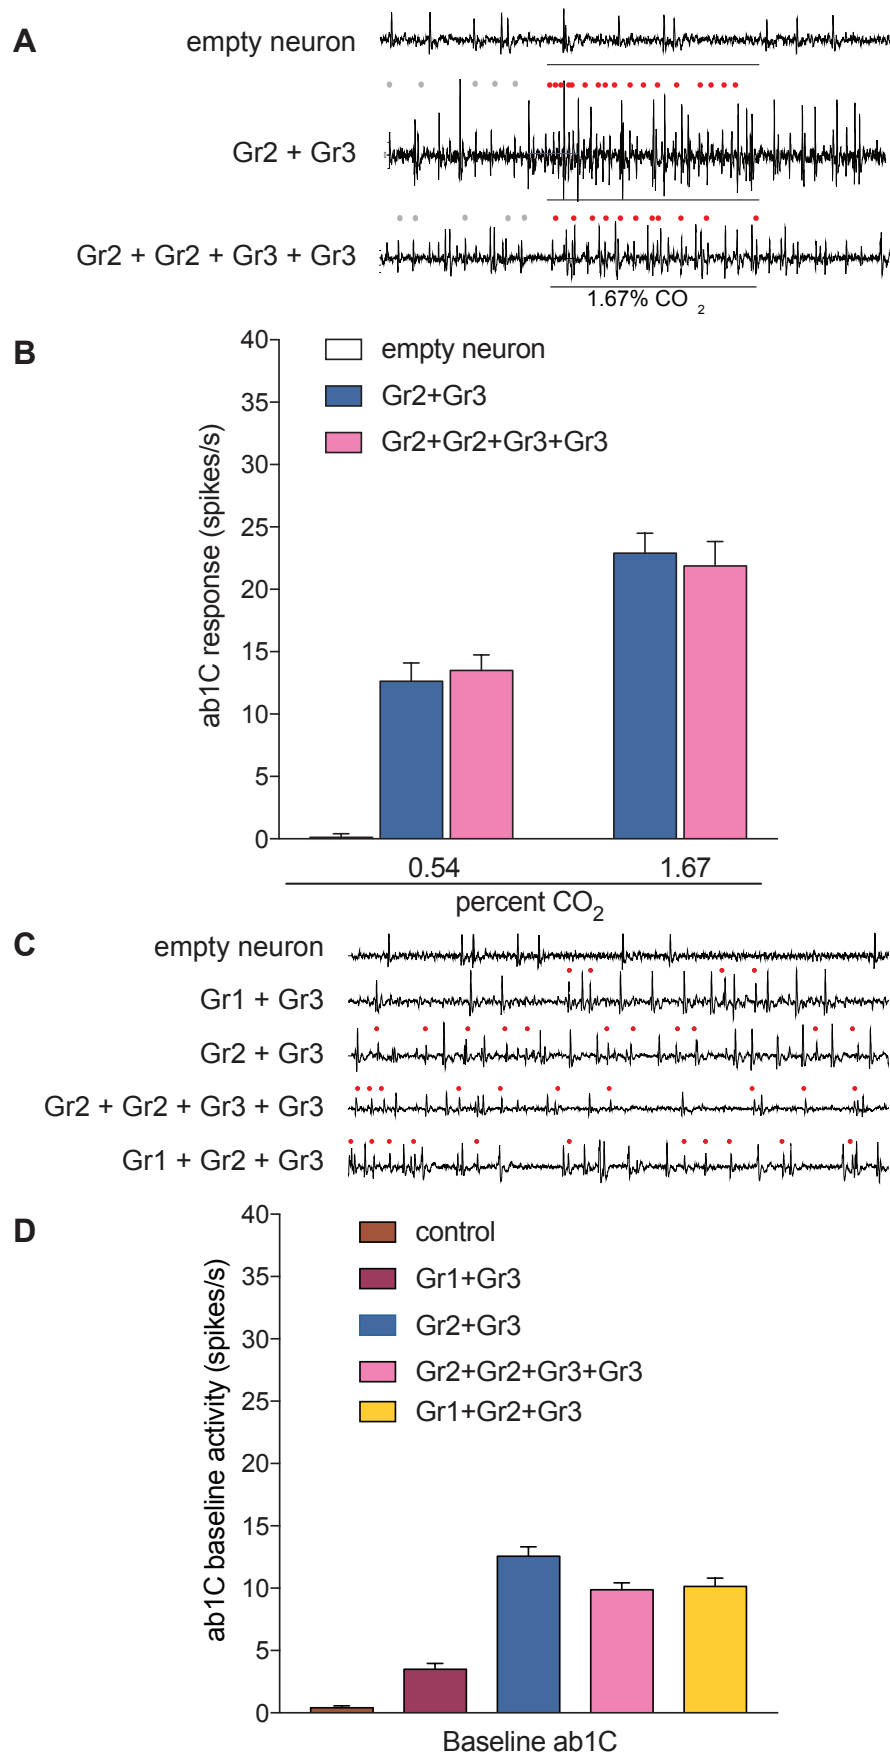

**Figure S3, related to Figure 3**

(A) Representative traces of the ab1 sensillum expressing mosquito receptors in the CO<sub>2</sub> empty neuron with responses to a 0.5 s stimulus of 1.67% CO<sub>2</sub>. Dots mark action potentials attributed to the ab1C neuron during part of the baseline and the 0.5 s stimulus window. (B) Mean transgenic ab1C responses to increasing concentrations of CO<sub>2</sub> (n = 8). (C) Representative traces of the baseline response of ab1 sensillum expressing mosquito receptors in the CO<sub>2</sub> empty neuron. (D) Mean ab1C baseline activity in spikes/s.

**Table S1. Related to Figures 2-4.  
Full genotypes and sources of flies used in transgenic experiments.**

Alleles used in transgenic experiments.

| <b>name</b> | <b>full allele designation</b> | <b>notes</b>                                    |
|-------------|--------------------------------|-------------------------------------------------|
| wild type   |                                | wCS (white Canton S) background                 |
| AaGr1       | <i>UAS-AaGr1A16</i>            | ΦC31 injection, attP40 site (2nd chromosome)    |
| AaGr1       | <i>UAS-AaGr1C49</i>            | ΦC31 injection, VK00027 site (3rd chromosome)   |
| AaGr2       | <i>UAS-AaGr2A10</i>            | ΦC31 injection, attP40 site (2nd chromosome)    |
| AaGr2       | <i>UAS-AaGr2C45</i>            | ΦC31 injection, VK00027 site (3rd chromosome)   |
| AaGr3       | <i>UAS-AaGr3A2</i>             | ΦC31 injection, attP40 site (2nd chromosome)    |
| AaGr3       | <i>UAS-AaGr3C46</i>            | ΦC31 injection, VK00027 site (3rd chromosome)   |
| ΔGr21a      | <i>Gr21a<sup>3</sup></i>       | CRISPR deletion, see Fig. 1                     |
| ΔGr63a      | <i>ΔGr63a</i>                  | Bloomington <i>Drosophila</i> Stock Center 9941 |
| GAL4        | <i>Gr63a-GAL4</i>              | Bloomington <i>Drosophila</i> Stock Center 9942 |

Full genotypes of transgenic flies. Allele/construct names are as above.

| <b>fly name</b>                        | <b>full genotype</b>                                                                                                                                                                                        |
|----------------------------------------|-------------------------------------------------------------------------------------------------------------------------------------------------------------------------------------------------------------|
| empty neuron                           | <i>w; ΔGr21a; ΔGr63a</i>                                                                                                                                                                                    |
| DmGr21a + AaGr3                        | <i>w; AaGr3; ΔGr63a, GAL4</i>                                                                                                                                                                               |
| AaGr1 + DmGr63a                        | <i>w; ΔGr21a, AaGr1; GAL4</i>                                                                                                                                                                               |
| AaGr2 + DmGr63a                        | <i>w; ΔGr21a, AaGr2; GAL4</i>                                                                                                                                                                               |
| AaGr1 + AaGr2 + DmGr63a                | <i>w; ΔGr21a, AaGr1/ΔGr21a, AaGr2; GAL4</i>                                                                                                                                                                 |
| <i>UAS-AaGr1, UAS-AaGr2, UAS-AaGr3</i> | <i>w; ΔGr21a, AaGr1/ΔGr21a, AaGr2; ΔGr63a, AaGr3/ΔGr63a</i><br><i>w; ΔGr21a, AaGr1/ΔGr21a, AaGr3; ΔGr63a, AaGr2/ΔGr63a</i><br><i>w; ΔGr21a, AaGr2/ΔGr21a, AaGr3; ΔGr63a, AaGr1/ΔGr63a</i>                   |
| <i>Gr63a-GAL4</i>                      | <i>w; ΔGr21a; ΔGr63a/ΔGr63a, GAL4</i>                                                                                                                                                                       |
| Gr1                                    | <i>w; ΔGr21a, AaGr1/ΔGr21a; ΔGr63a/ΔGr63a, GAL4</i>                                                                                                                                                         |
| Gr2                                    | <i>w; ΔGr21a, AaGr2/ΔGr21a; ΔGr63a/ΔGr63a, GAL4</i>                                                                                                                                                         |
| Gr3                                    | <i>w; ΔGr21a, AaGr3/ΔGr21a; ΔGr63a/ΔGr63a, GAL4</i>                                                                                                                                                         |
| Gr1 + Gr2                              | <i>w; ΔGr21a, AaGr1/ΔGr21a, AaGr2; ΔGr63a/ΔGr63a, GAL4</i>                                                                                                                                                  |
| Gr1 + Gr3                              | <i>w; ΔGr21a, AaGr1/ΔGr21a, AaGr3; ΔGr63a/ΔGr63a, GAL4</i>                                                                                                                                                  |
| Gr2 + Gr3                              | <i>w; ΔGr21a, AaGr2/ΔGr21a, AaGr3; ΔGr63a/ΔGr63a, GAL4</i><br><i>w; ΔGr21a, AaGr2/ SΔGr21a; ΔGr63a, AaGr3/ΔGr63a, GAL4</i>                                                                                  |
| Gr1 + Gr2 + Gr3                        | <i>w; ΔGr21a, AaGr1/ΔGr21a, AaGr2; ΔGr63a, AaGr3/ΔGr63a, GAL4</i><br><i>w; ΔGr21a, AaGr1/ΔGr21a, AaGr3; ΔGr63a, AaGr2/ΔGr63a, GAL4</i><br><i>w; ΔGr21a, AaGr2/ΔGr21a, AaGr3; ΔGr63a, AaGr1/ΔGr63a, GAL4</i> |

| <b>fly name</b>                | <b>full genotype</b>                                                           |
|--------------------------------|--------------------------------------------------------------------------------|
| Gr2 + Gr2 + Gr3 + Gr3          | <i>w; ΔGr21a,AaGr2/ ΔGr21a,AaGr2;<br/>ΔGr63a,AaGr3,GAL4/ΔGr63a,AaGr3</i>       |
| Gr1 + Gr1 + Gr2+ Gr3           | <i>w; ΔGr21a,AaGr1/ ΔGr21a,AaGr1;<br/>ΔGr63a,AaGr3,GAL4/ΔGr63a,AaGr2</i>       |
| Gr1 + Gr2 + Gr2 + Gr3 +<br>Gr3 | <i>w; ΔGr21a,AaGr3/ ΔGr21a,AaGr2;<br/>ΔGr63a,AaGr1,AaGr2/ΔGr63a,AaGr3,GAL4</i> |
